# Supplementary material
Source: Springer Nature journal article supplement (https://www.springermedizin.de/resource/supplementary/12943_2012_1103_MOESM2_ESM.pdf/9552488)

**A**

Position 2859-2866 of PTEN-3'UTR 5'...AGUUCUAGAAAUUUU**GUGCAAU**A...3',  
Hsa-miR-32 3' ACGUUGAAUCAUUA**CACGUUAU**

**B**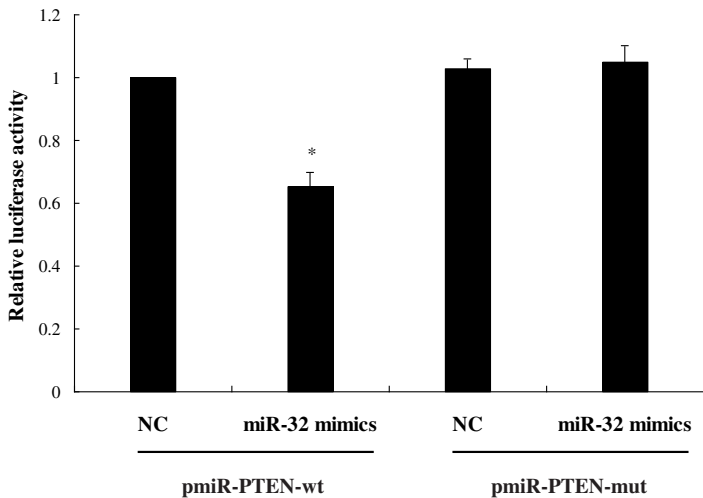

Supplement: MOESM2 [file 9552488]
